# Supplementary material for: miR-508-3p suppresses the development of ovarian carcinoma by targeting CCNA2 and MMP7
Source: PubMed Central journal article supplement — Int J Oncol. 2020 Apr 27;57(1):264–76. doi: 10.3892/ijo.2020.5055 (PMC7252466; doi:10.3892/ijo.2020.5055), 2020-04-27
Supplement: Supplementary_Data.pdf [file Supplementary_Data.pdf]

Figure S1. Relative miR-508-3p levels in ovarian cancer cells (A) HeyA8, (B) SKOV3 and (C) A2780 transfected with miR-508-3p or miR-ctrl analyzed by reverse transcription-quantitative PCR and normalized to U6. Wilcoxon test was used to analyze the data. \*\*P<0.01. miR, microRNA; ctrl, control.

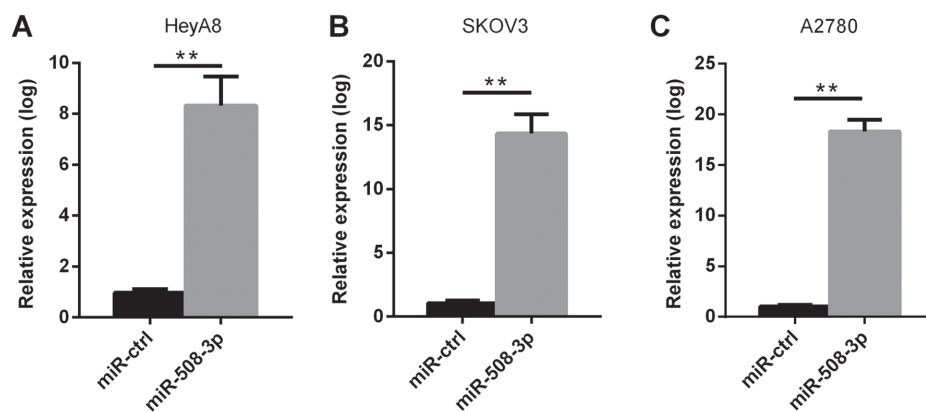

Table SI. Associations between patient clinicopathological characteristics and the expression of miR-508-3p in ovarian cancer.

| Characteristic          | N (130) | miR-508-3p |      | $\chi^2$ P-value   |
|-------------------------|---------|------------|------|--------------------|
|                         |         | Low        | High |                    |
| Age, years              |         |            |      | 0.598              |
| <59                     | 65      | 29         | 36   |                    |
| $\geq$ 59               | 65      | 32         | 33   |                    |
| Grade <sup>b</sup>      |         |            |      | 0.549              |
| Low                     | 33      | 14         | 19   |                    |
| High                    | 97      | 47         | 50   |                    |
| FIGO stage <sup>b</sup> |         |            |      | 0.028 <sup>a</sup> |
| I+II                    | 40      | 13         | 27   |                    |
| III+IV                  | 90      | 48         | 42   |                    |
| Residual disease, cm    |         |            |      | 0.307              |
| $\leq$ 1                | 95      | 42         | 53   |                    |
| >1                      | 35      | 19         | 16   |                    |
| Ascites cytology        |         |            |      | 0.105              |
| Negative                | 84      | 35         | 49   |                    |
| Positive                | 46      | 26         | 20   |                    |

<sup>a</sup>P<0.05. <sup>b</sup>FIGO staging system (2013). miR, microRNA.

Table SII. Associations between patient clinicopathological characteristics and the expression of CCNA2 in ovarian cancer.

| Characteristic          | N (130) | CCNA2 |      | $\chi^2$ P-value |
|-------------------------|---------|-------|------|------------------|
|                         |         | Low   | High |                  |
| Age, years              |         |       |      | 0.587            |
| <59                     | 65      | 42    | 23   |                  |
| $\geq$ 59               | 65      | 32    | 26   |                  |
| Grade <sup>a</sup>      |         |       |      | 0.516            |
| Low                     | 33      | 19    | 14   |                  |
| High                    | 97      | 62    | 35   |                  |
| FIGO stage <sup>a</sup> |         |       |      | 0.415            |
| I+II                    | 40      | 27    | 13   |                  |
| III+IV                  | 90      | 54    | 36   |                  |
| Residual disease, cm    |         |       |      | 0.252            |
| $\leq$ 1                | 95      | 62    | 33   |                  |
| >1                      | 35      | 19    | 16   |                  |
| Ascites cytology        |         |       |      | 0.802            |
| Negative                | 84      | 53    | 31   |                  |
| Positive                | 46      | 28    | 18   |                  |

<sup>a</sup>FIGO staging system (2013). CCNA2, cyclin A2.

Table SIII. Associations between patient clinicopathological characteristics and the expression of MMP7 in ovarian cancer.

| Characteristic          | N (130) | MMP7 |      | $\chi^2$ P-value |
|-------------------------|---------|------|------|------------------|
|                         |         | Low  | High |                  |
| Age, years              |         |      |      | 0.079            |
| <59                     | 65      | 38   | 27   |                  |
| $\geq$ 59               | 65      | 28   | 37   |                  |
| Grade <sup>a</sup>      |         |      |      | 0.921            |
| Low                     | 33      | 17   | 16   |                  |
| High                    | 97      | 49   | 48   |                  |
| FIGO stage <sup>a</sup> |         |      |      | 0.520            |
| I+II                    | 40      | 22   | 18   |                  |
| III+IV                  | 90      | 44   | 46   |                  |
| Residual disease, cm    |         |      |      | 0.484            |
| $\leq$ 1                | 95      | 50   | 45   |                  |
| >1                      | 35      | 16   | 19   |                  |
| Ascites cytology        |         |      |      | 0.219            |
| Negative                | 84      | 46   | 38   |                  |
| Positive                | 46      | 20   | 26   |                  |

<sup>a</sup>FIGO staging system (2013). MMP7, matrix metalloproteinase 7.
